# Supplementary material for: Monobodies with potent neutralizing activity against SARS-CoV-2 Delta and other variants of concern
Source: Life Sci Alliance. 2022 Mar 7;5(6):e202101322. doi: 10.26508/lsa.202101322 (PMC8906176; doi:10.26508/lsa.202101322)
Supplement: Supplementary file 1 [file LSA-2021-01322_TableS1.xlsx]

## Sheet: Sheet1
	Table S1. Kinetic parameters of monobodies against RBD of SARS-CoV-2 variants of concern determined by BLI. The data were fitted by a 2:1 heterogeneous ligand model.
	RBD	Parameters	C4-AM2
	Beta	KD1, KD2(nM)	2.6, 20
	(B.1.351)	kon1, kon2 (1/Ms) × 105	1.3, 3.2
		koff1, koff2 (1/s) × 10−4	3.4, 66
	Gamma	KD1, KD2(nM)	1.4, 13
	(P.1)	kon1, kon2 (1/Ms) × 105	2.0, 4.4
		koff1, koff2 (1/s) × 10−4	2.7, 57
	Delta	KD1, KD2(nM)	<0.01, 3.6
	(B.1.617.2)	kon1, kon2 (1/Ms) × 105	1.7, 2.0
		koff1, koff2 (1/s) × 10−4	<0.01, 7.1
