# Supplementary material for: Monobodies with potent neutralizing activity against SARS-CoV-2 Delta and other variants of concern
Source: Life Sci Alliance. 2022 Mar 7;5(6):e202101322. doi: 10.26508/lsa.202101322 (PMC8906176; doi:10.26508/lsa.202101322)
Supplement: Supplementary file 5 [file LSA-2021-01322_TableS4.xlsx]

## Sheet: Sheet1
	Table S4. Selection conditions for the second affinity maturation of the monobodies C6b and C12b.
		1st	2nd	3rd	4th	5th	6th	7th	8th
	RBD (nM)	10	1	1	1	1	1	1	1
	RBD (pmol)	5	0.5	0.5	0.5	0.5	0.5	0.5	0.5
	Incubation time for binding (min)	2	2	2	2	2	2	2	2
	Beads (µL)	2	2	2	2	2	2	2	2
	Incubation time for collection of RBD (min)	2	2	2	2	2	2	2	2
	Beads washing volume (µL)	50	100	500	500	500	500	500	500
	Beads washing time (min)	20	20	30	30	30	30	30	30
	Numbers of beads washing cycles	3	3	4	4	4	4	4	4
	Beads washing volume in the additional washing step (mL)				0.5	0.5	0.5	0.5	0.5
	Beads washing time in the additional washing step (h)				15	15	15	15	15
	Concentration of the monobody C6b or C12b in the additional washing step (µM)				0.1	0.5	0.5	0.5	0.5
